# Supplementary material for: Starburst dendrimers consisting of triphenylamine core and 9-phenylcarbazole-based dendrons: synthesis and properties
Source: Royal Society of Chemistry journal article supplement (doi:10.1039/c2ob26483h), 2012-01-01
Supplement: c2ob26483h.pdf [file c2ob26483h.pdf]

# Supporting Information

## Starburst dendrimers consisting of triphenylamine core and 9-phenylcarbazole-based dendrons: synthesis and property

Jia You, Guiyang Li and Zhonggang Wang\*

State Key Laboratory of Fine Chemicals, Department of Polymer Science and Materials, Dalian University of Technology School of Chemical Engineering, Dalian University of Technology, Dalian, 116024, China

\*Email: zgwang@dlut.edu.cn

### Contents

**Figure 1S.**  $^1\text{H}$  NMR spectrum of G2-Br in chloroform-d (page 2).

**Figure 2S.**  $^1\text{H}$  NMR spectrum of G2-B(OH)<sub>2</sub> in chloroform-d (page 3).

**Figure 3S.**  $^1\text{H}$  NMR spectrum of G3-Br in chloroform-d (page 4).

**Figure 4S.**  $^1\text{H}$  NMR spectrum of G3-B(OH)<sub>2</sub> in chloroform-d (page 5).

**Figure 5S.**  $^1\text{H}$  NMR spectrum of **G1** in chloroform-d (page 6).

**Figure 6S.**  $^1\text{H}$  NMR spectrum of **G2** in chloroform-d (page 7).

**Figure 7S.**  $^{13}\text{C}$  NMR spectrum of G3-Br in chloroform-d (page 8).

**Figure 8S.**  $^{13}\text{C}$  NMR spectrum of G3-B(OH)<sub>2</sub> in chloroform-d (page 9).

**Figure 9S.**  $^{13}\text{C}$  NMR spectrum of **G1** in chloroform-d (page 10).

**Figure 10S.**  $^{13}\text{C}$  NMR spectrum of **G2** in chloroform-d (page 11).

**Figure 11S.**  $^{13}\text{C}$  NMR spectrum of **G3** in chloroform-d (page 12).

**Figure 12S.** FT-IR spectra of dendrimers **G1-G3** (page 13).

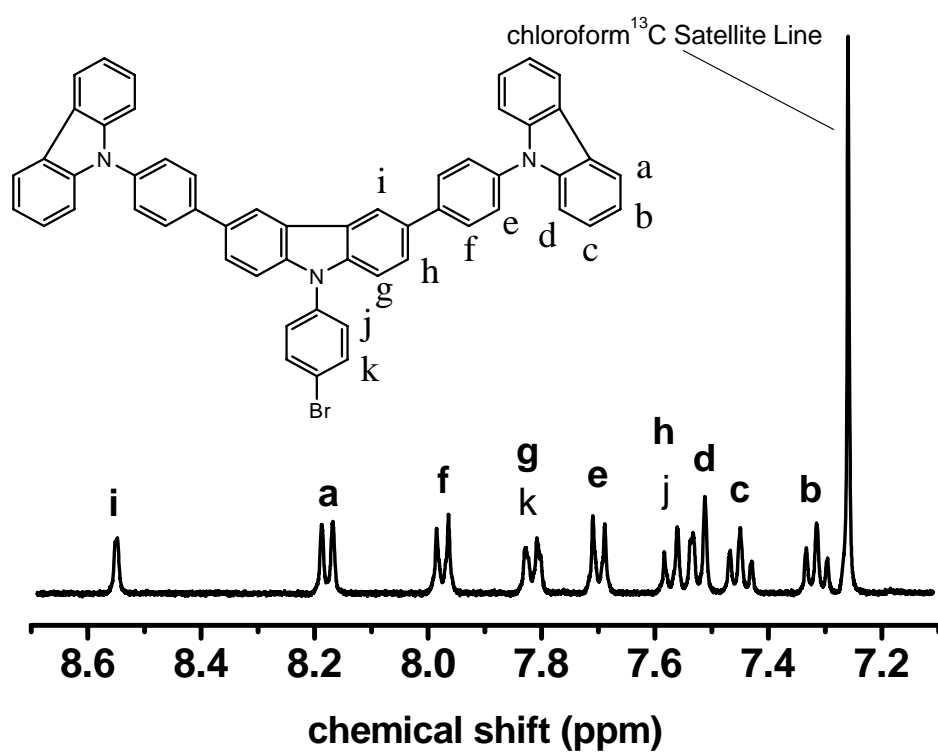

Figure 1S. <sup>1</sup>H NMR spectrum of G2-Br in chloroform-d.

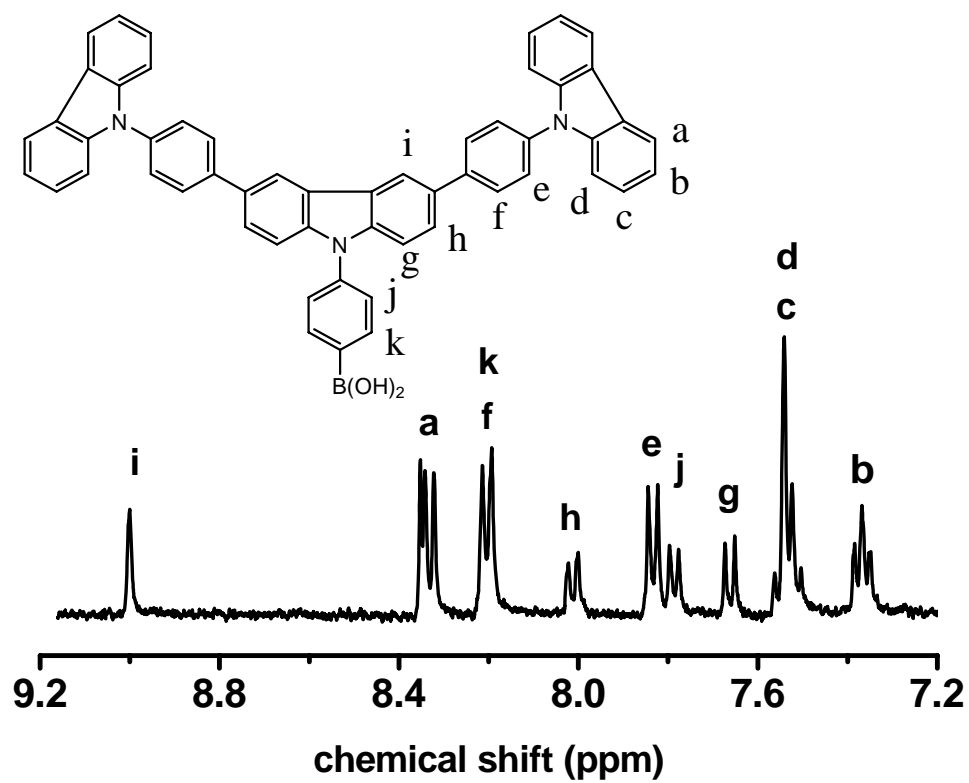

Figure 2S. <sup>1</sup>H NMR spectrum of G2-B(OH)<sub>2</sub> in chloroform-d.

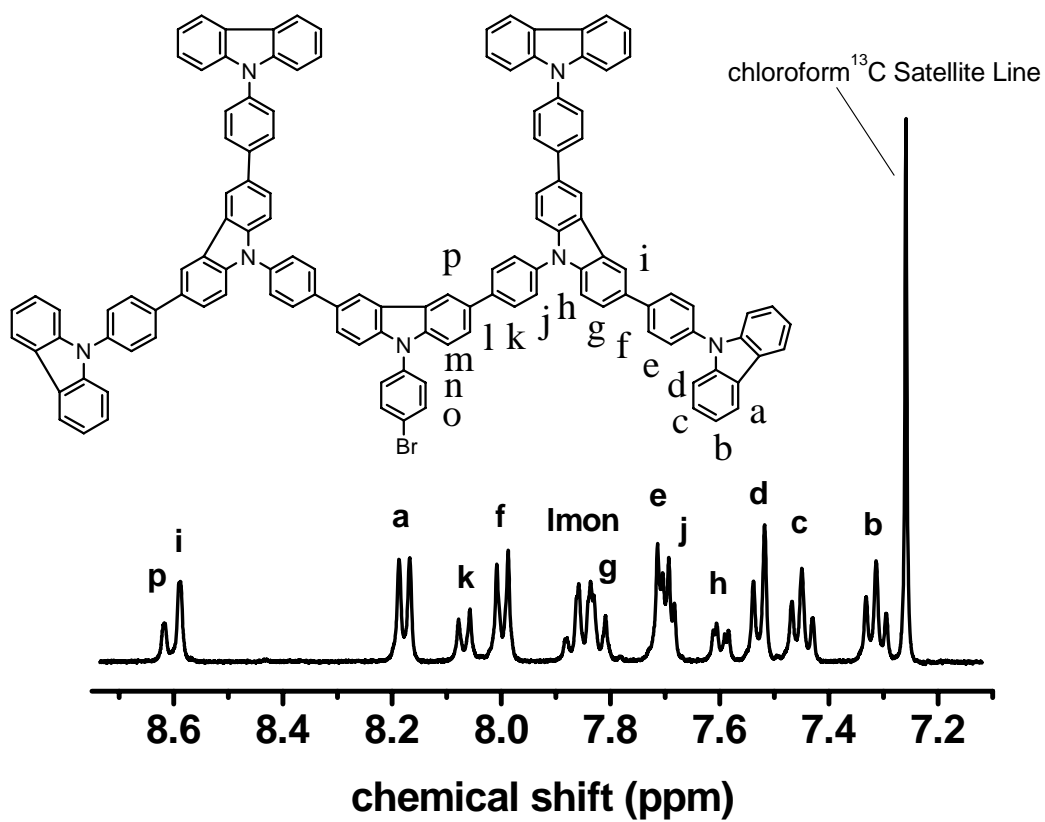

Figure 3S.  $^1\text{H}$  NMR spectrum of G3-Br in chloroform-d.

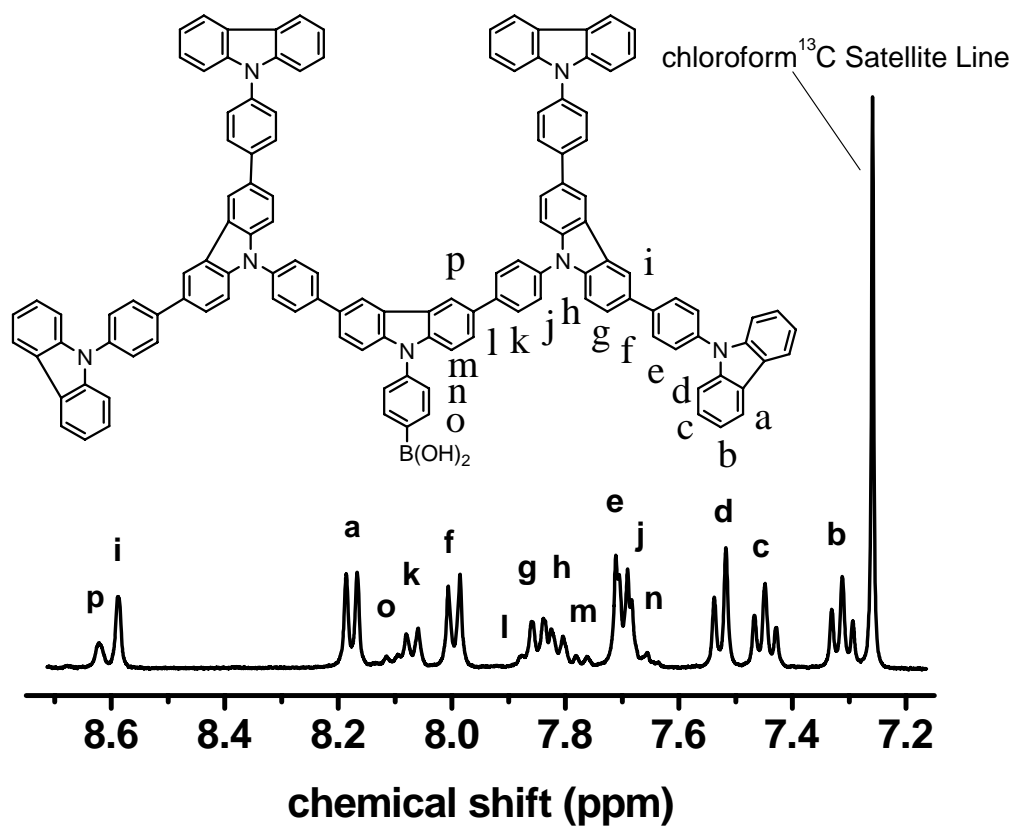

**Figure 4S.** <sup>1</sup>H NMR spectrum of G3-B(OH)<sub>2</sub> in chloroform-d.

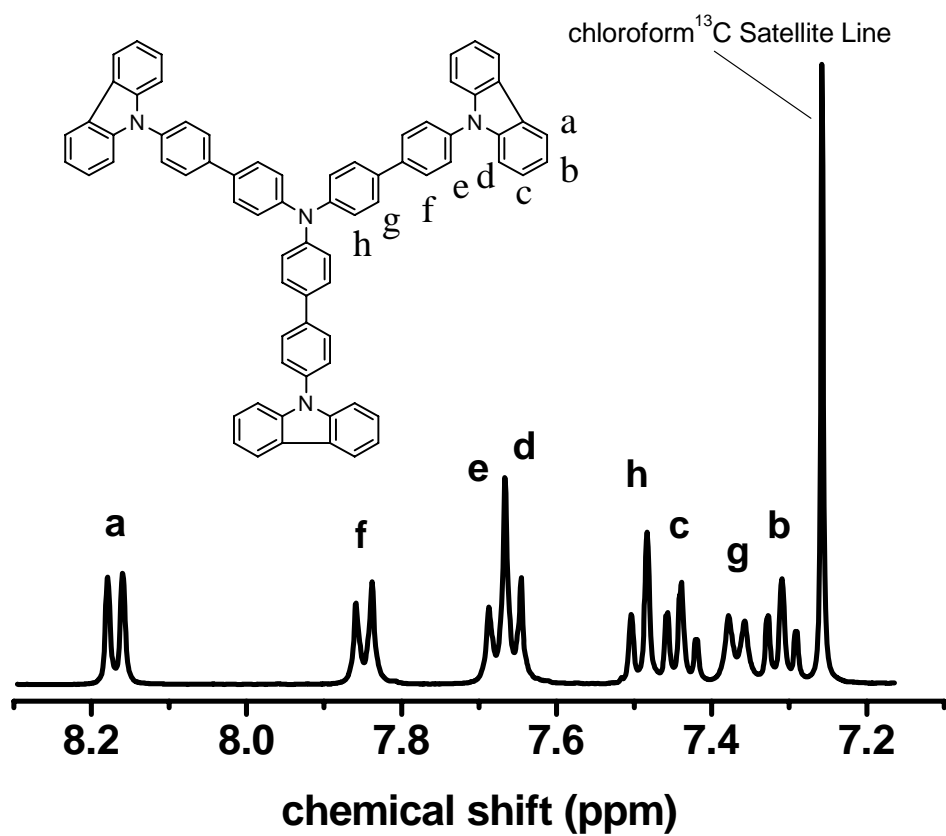

**Figure 5S.**  $^1\text{H}$  NMR spectrum of **G1** in chloroform-d.

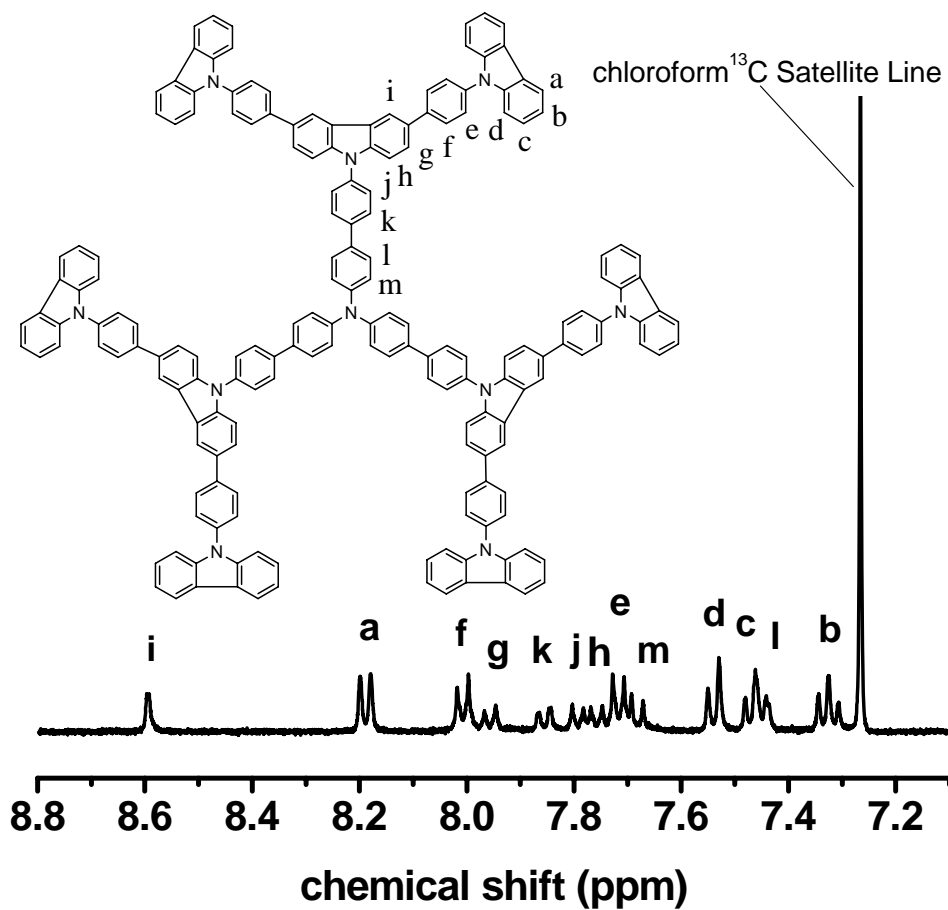

**Figure 6S.**  $^1\text{H}$  NMR spectrum of G2 in chloroform-d.

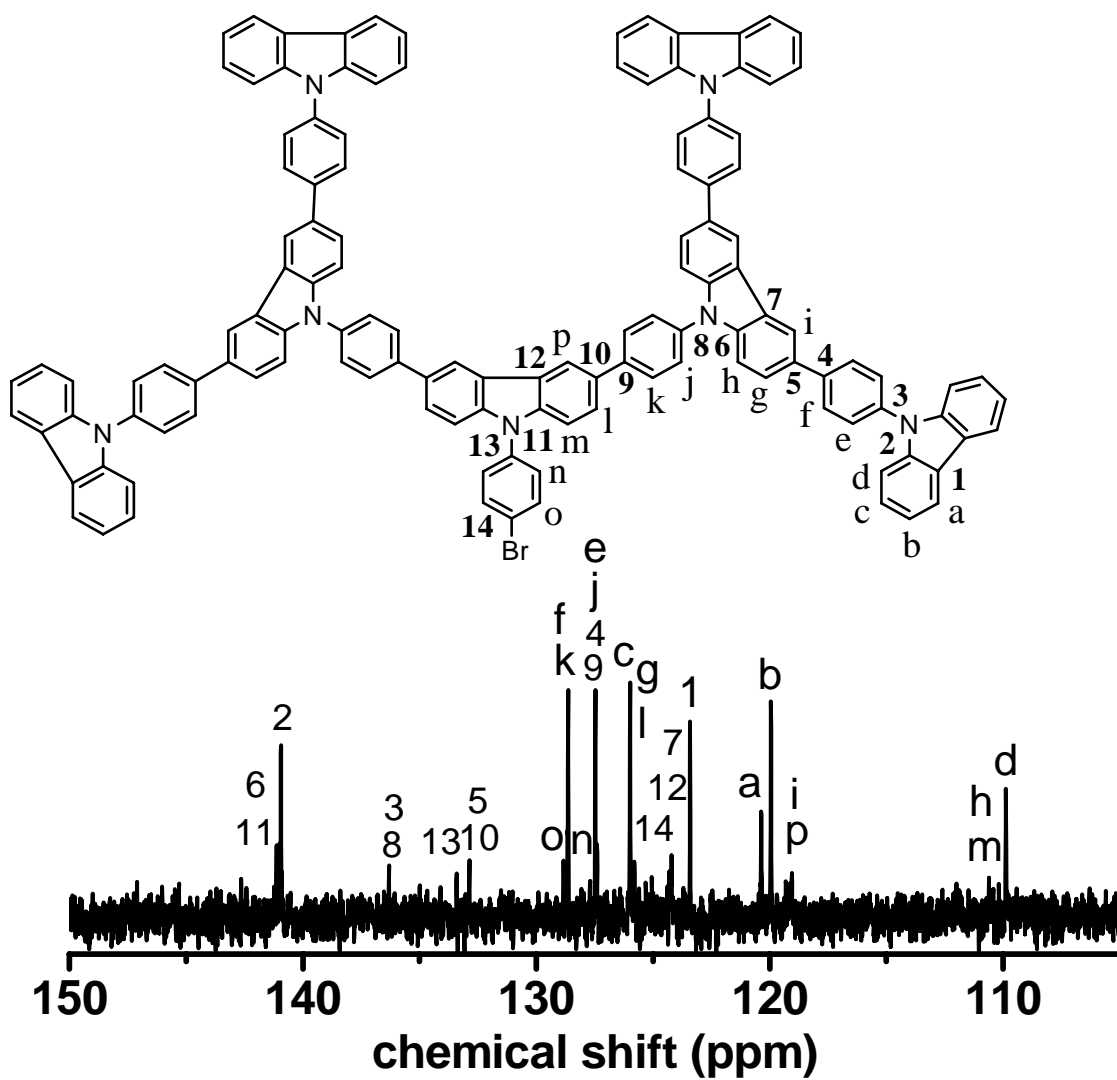

Figure 7S.  $^{13}\text{C}$  NMR spectrum of G3-Br in chloroform-d.



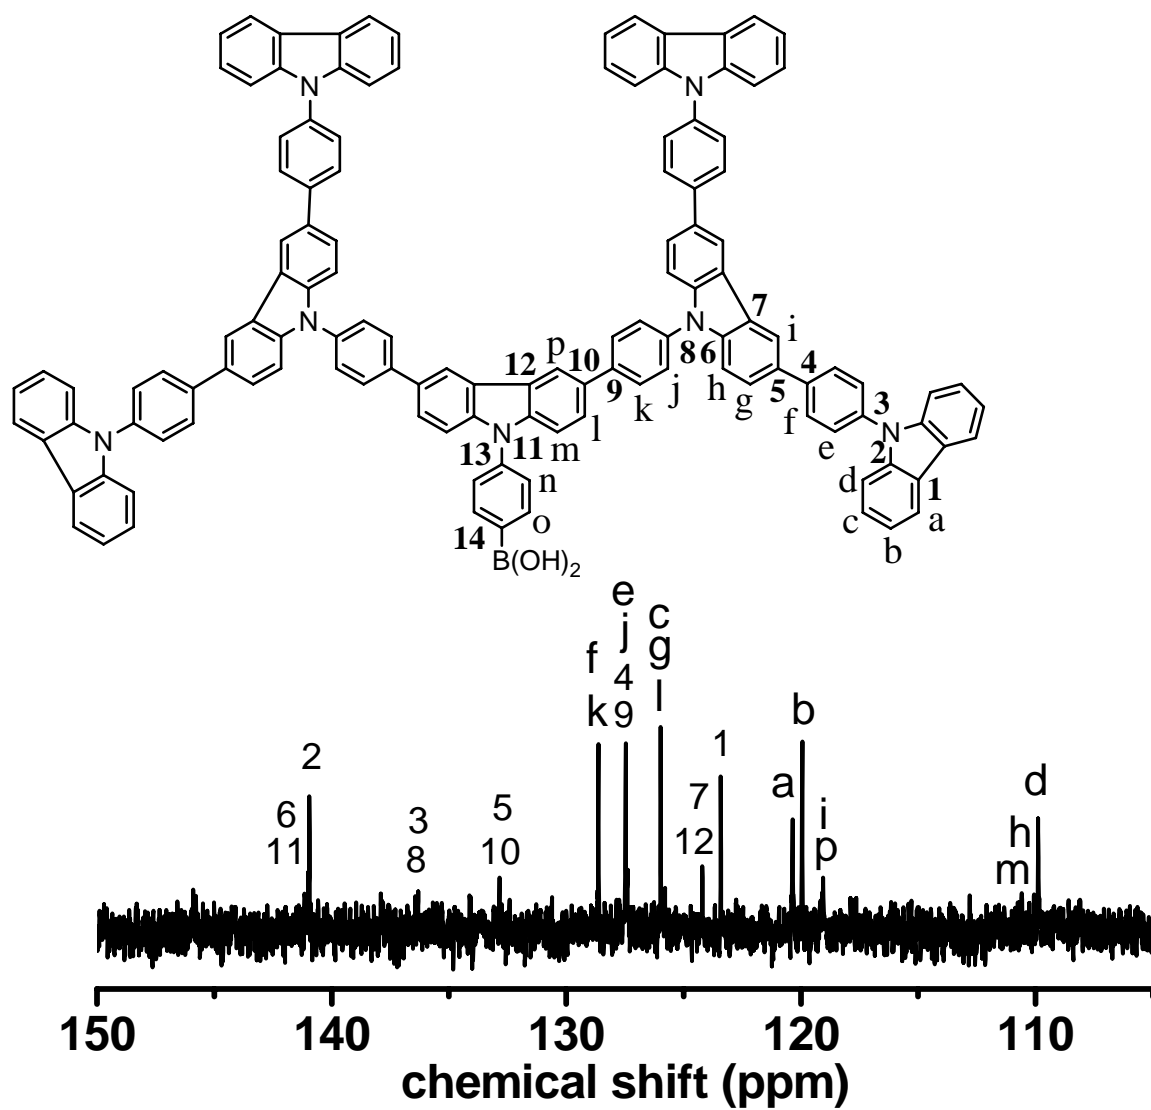

Figure 8S. <sup>13</sup>C NMR spectrum of G3-B(OH)<sub>2</sub> in chloroform-d.

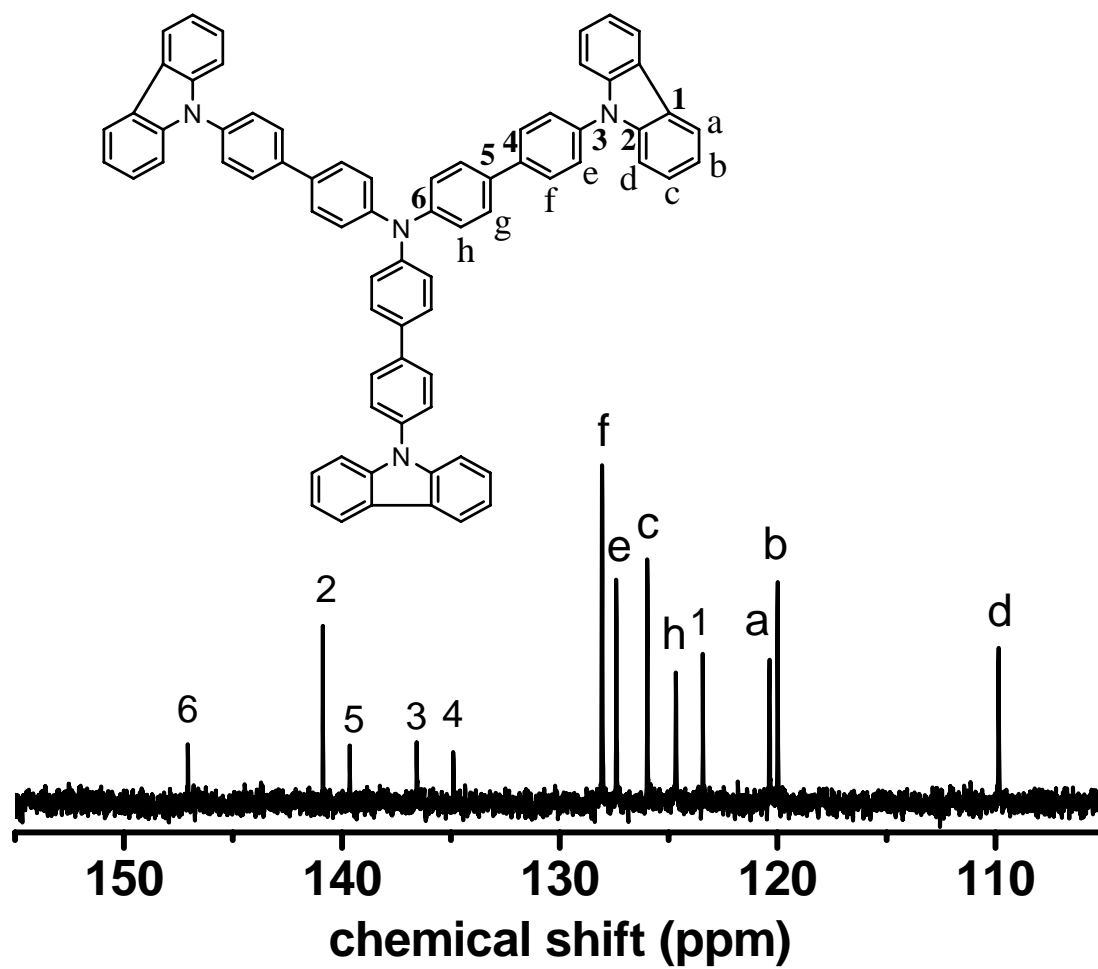

Figure 9S.  $^{13}\text{C}$  NMR spectrum of G1 in chloroform-d.

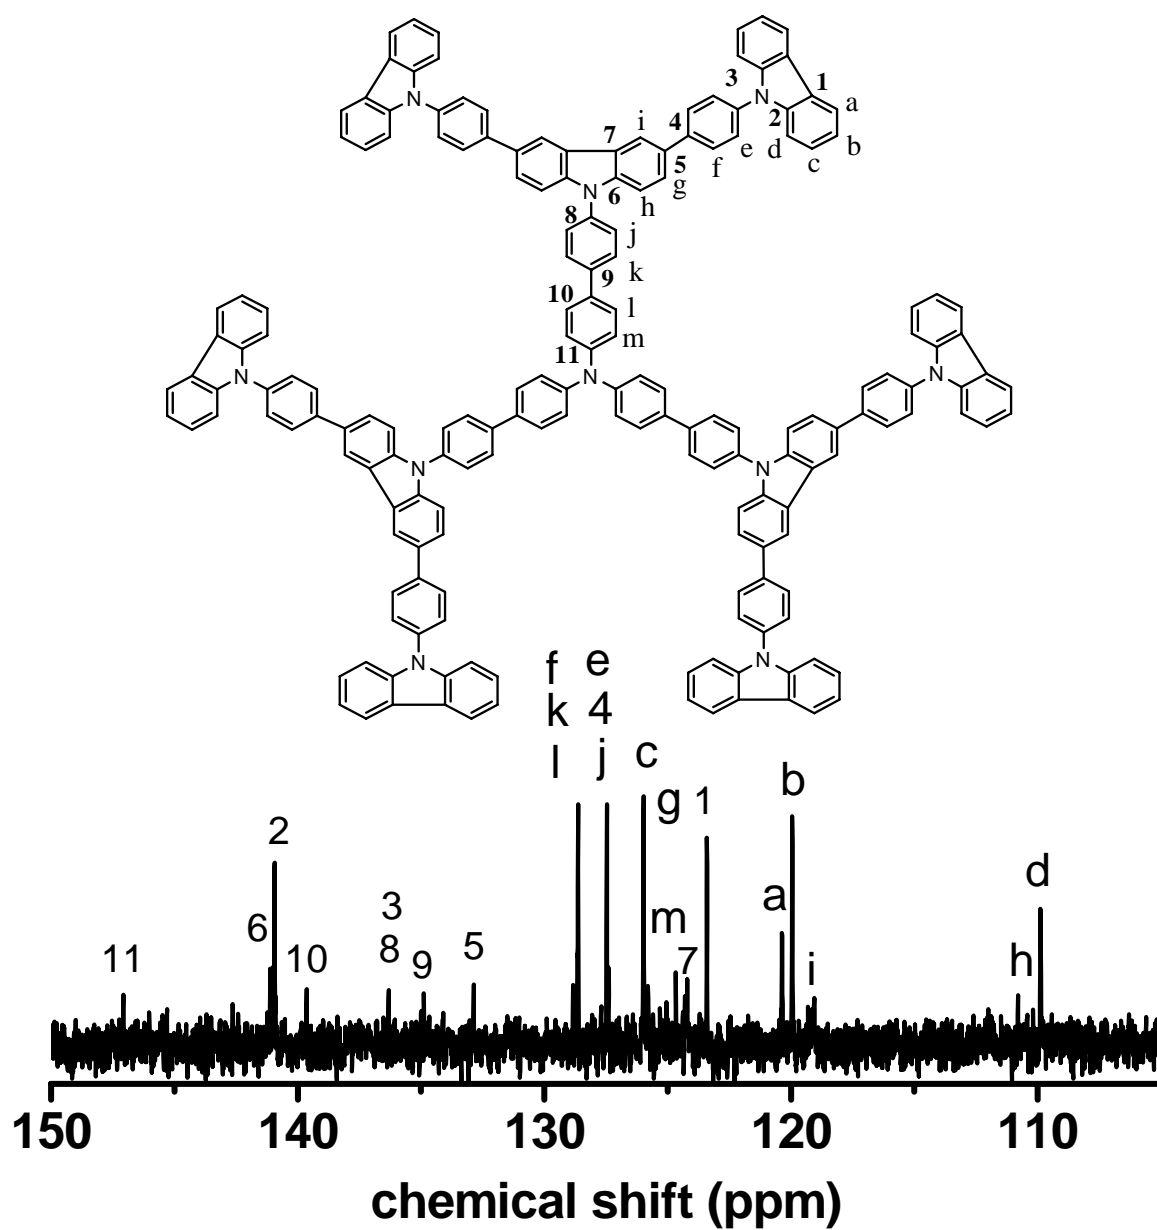

Figure 10S. <sup>13</sup>C NMR spectrum of G2 in chloroform-d.

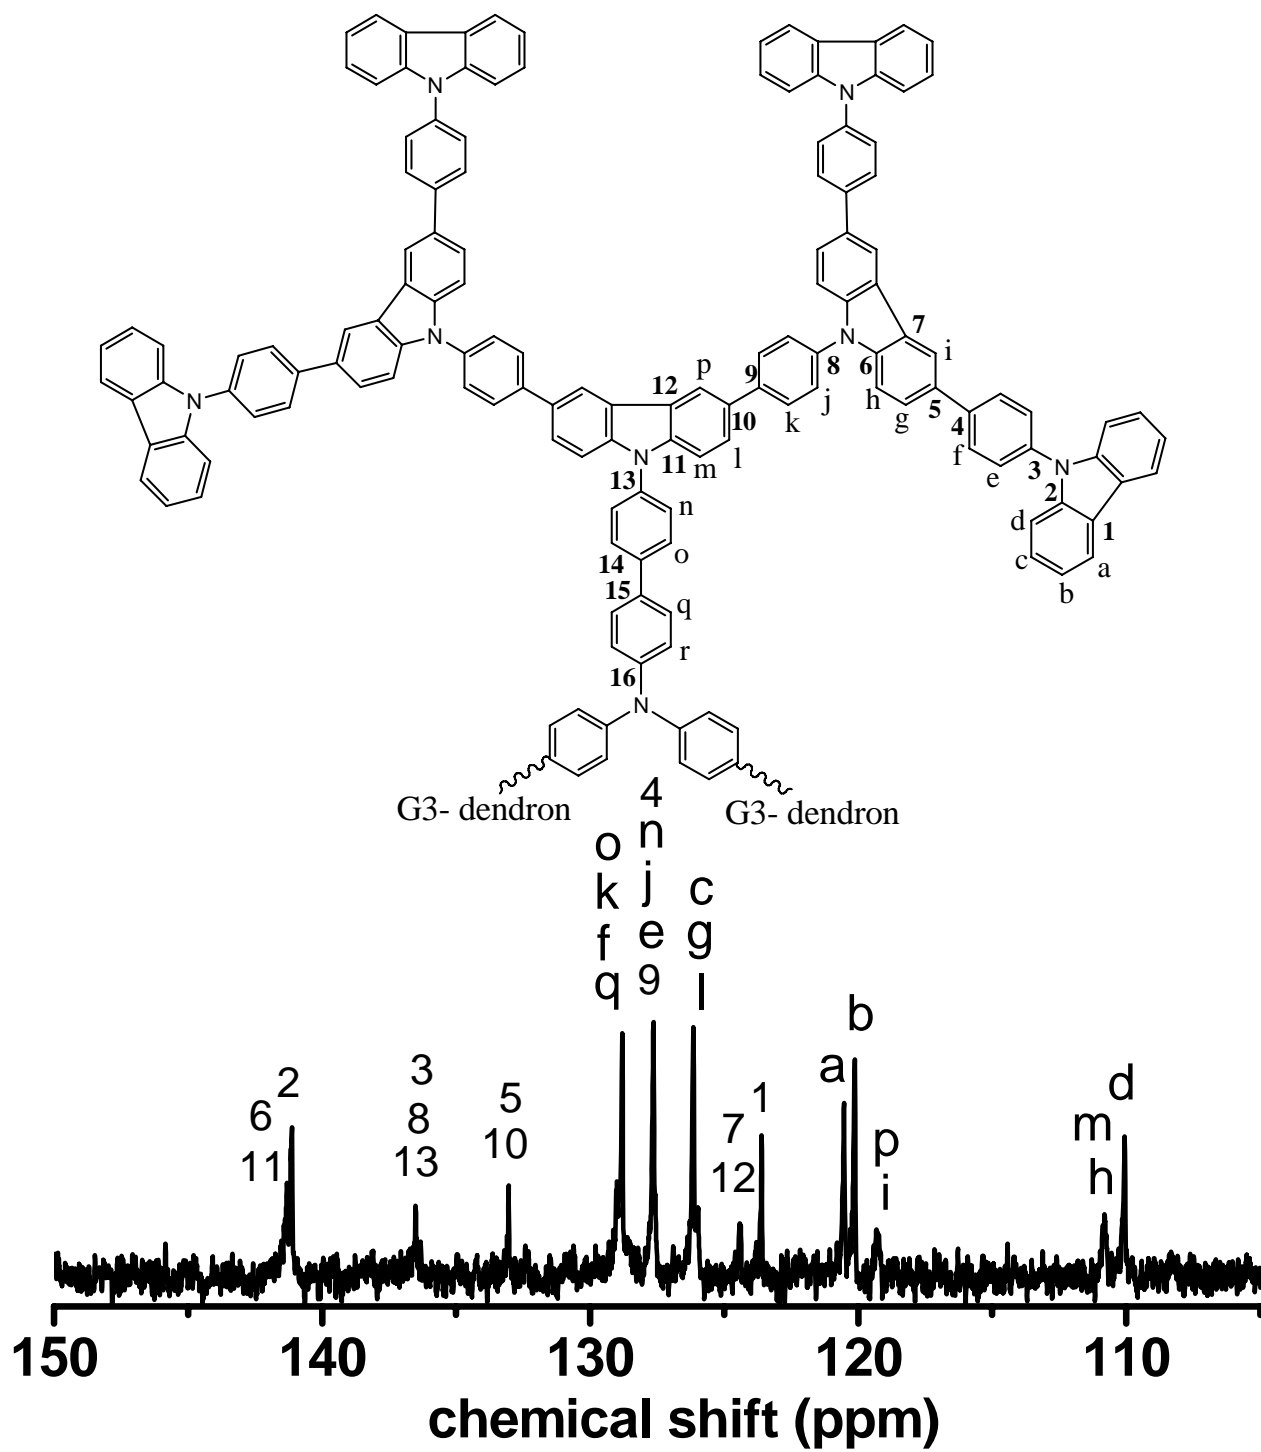

Figure 11S.  $^{13}\text{C}$  NMR spectrum of G3 in chloroform-d.

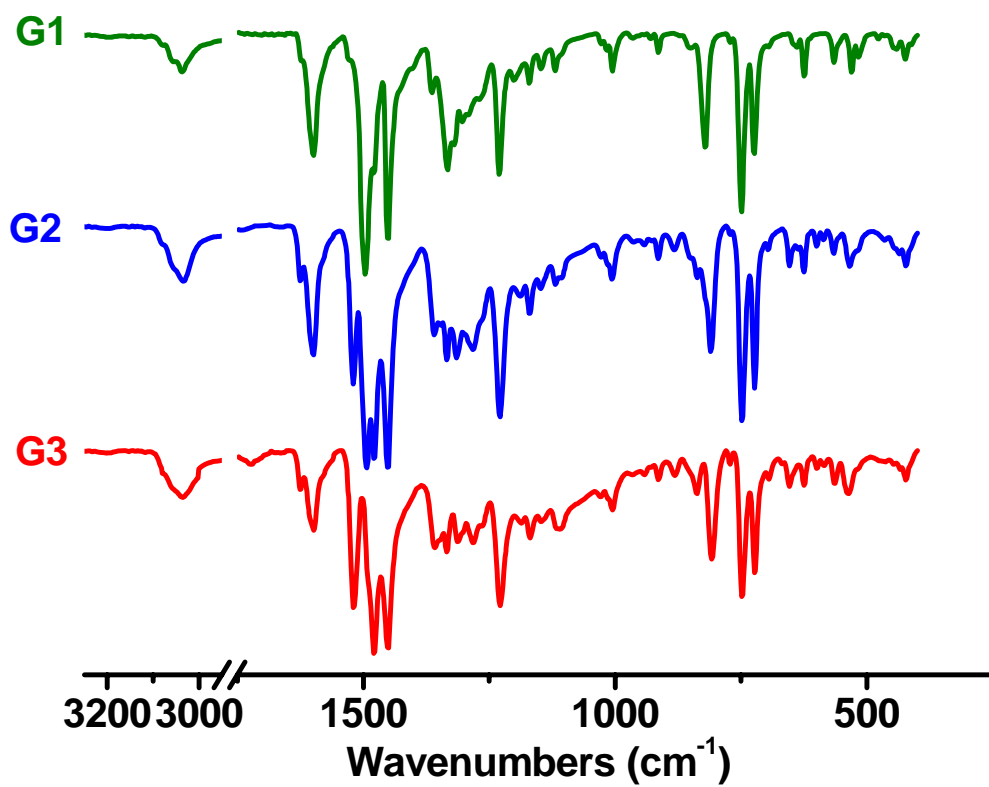

**Figure 12S.** FT-IR spectra of dendrimers G1-G3.
